# Supplementary material for: Purification and Characterization of a Novel Antifungal Flagellin Protein from Endophyte Bacillus methylotrophicus NJ13 against Ilyonectria robusta
Source: MDPI journal article supplement (doi:10.3390/microorganisms7120605), 2019-11-22
Supplement: s1 [file s1]

## Appendix B

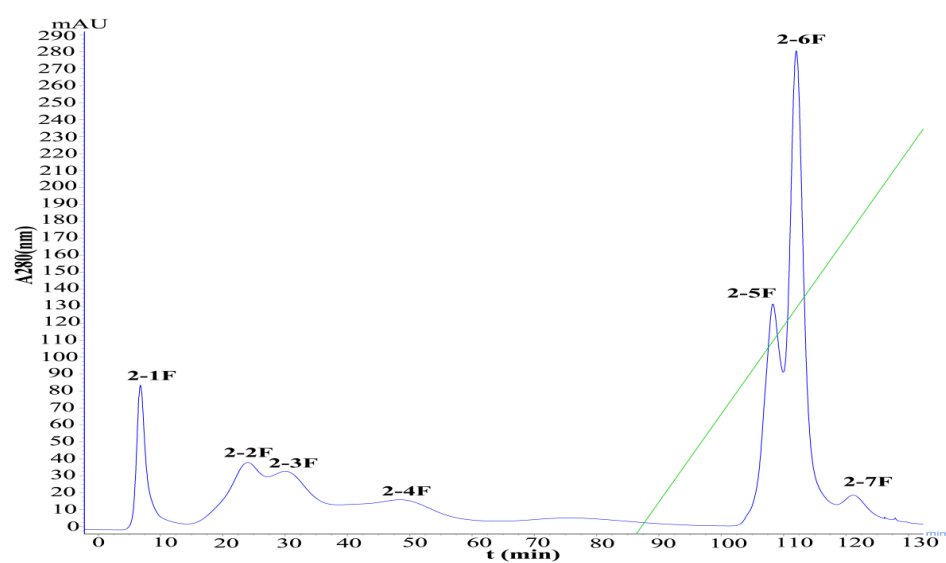

**Figure S1** Results of active peak 2F eluted by weak anion exchange chromatography

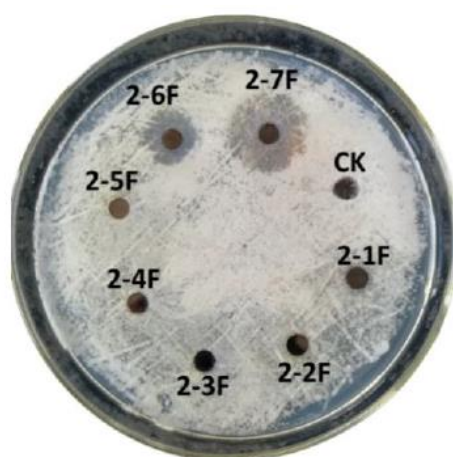

**Figure S2** Antifungal effect of elution peak 2-6F (Note: CK for control)

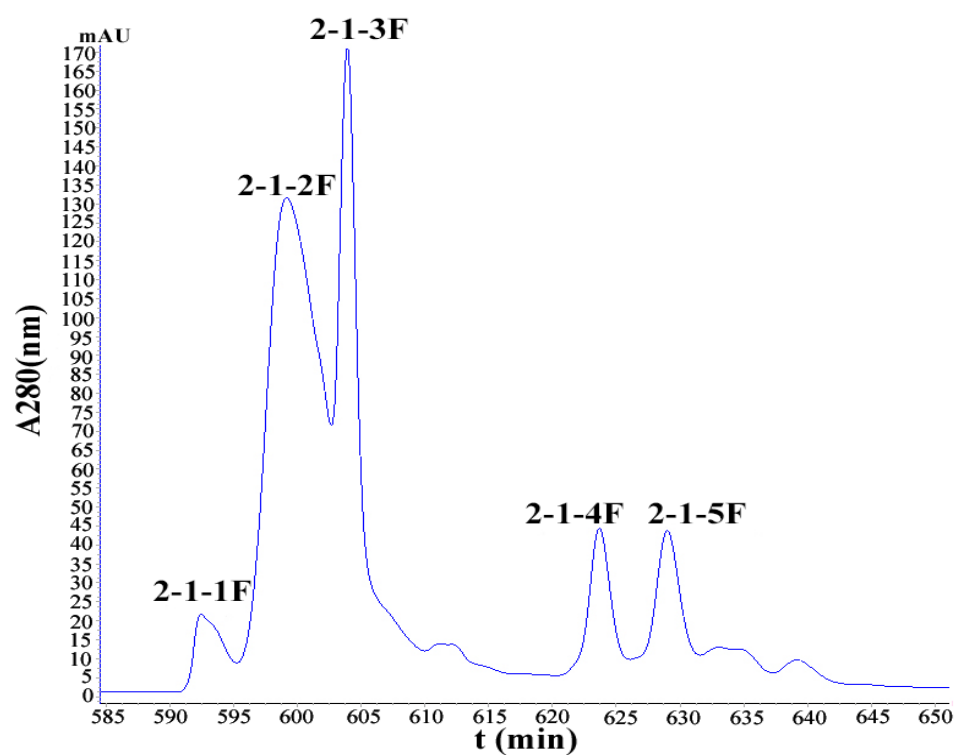

**Figure S3** Results of active peak 2-6F eluted by gel filtration chromatography

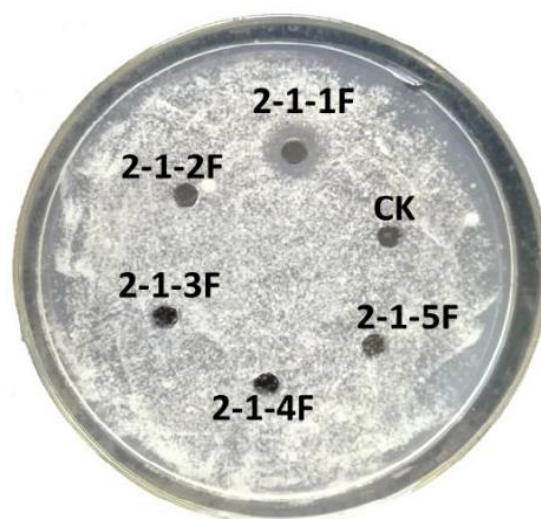

**Figure S4** Antifungal effect of elution peak 2-1-1F

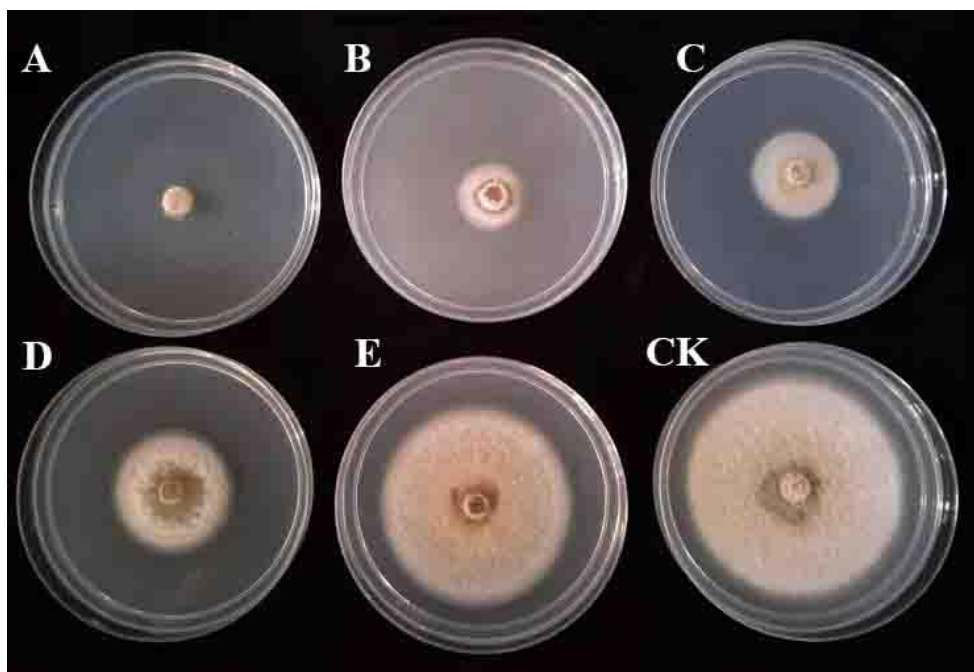

**Figure S5** Toxicity test of elution peak 2-1-1F. A)  $1.875 \times 10^5$  mg/L, B)  $1.875 \times 10^4$  mg/L, C)  $1.875 \times 10^3$  mg/L, D)  $1.875 \times 10^2$  mg/L, E)  $1.875 \times 10^1$  mg/L, CK for control.

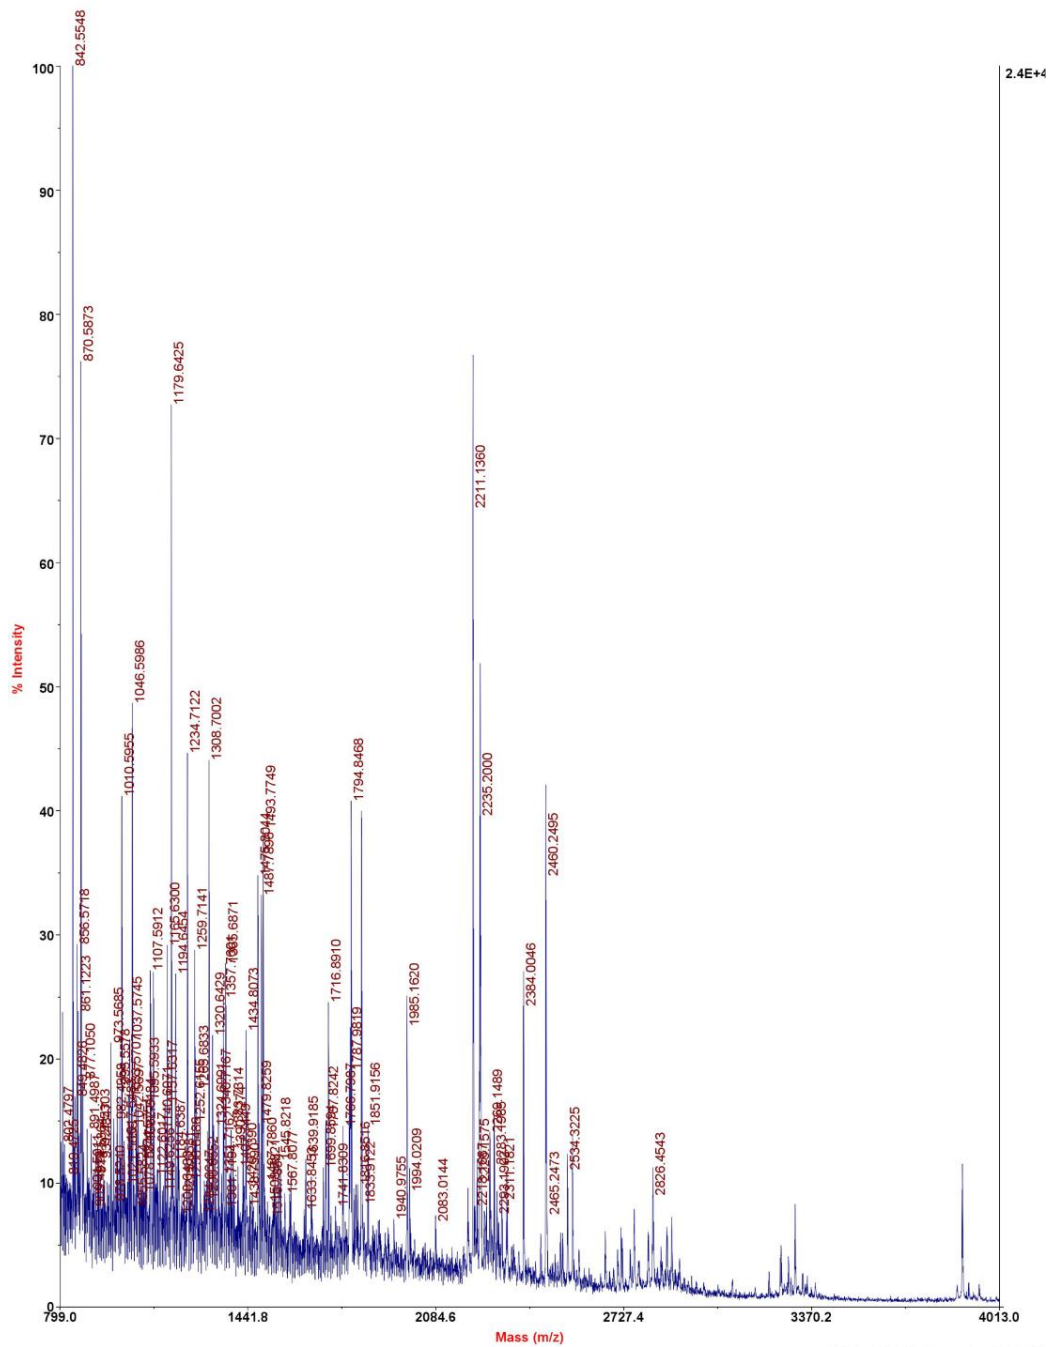

Figure S6 Primary mass spectrum antifungal protein 2-1-1F

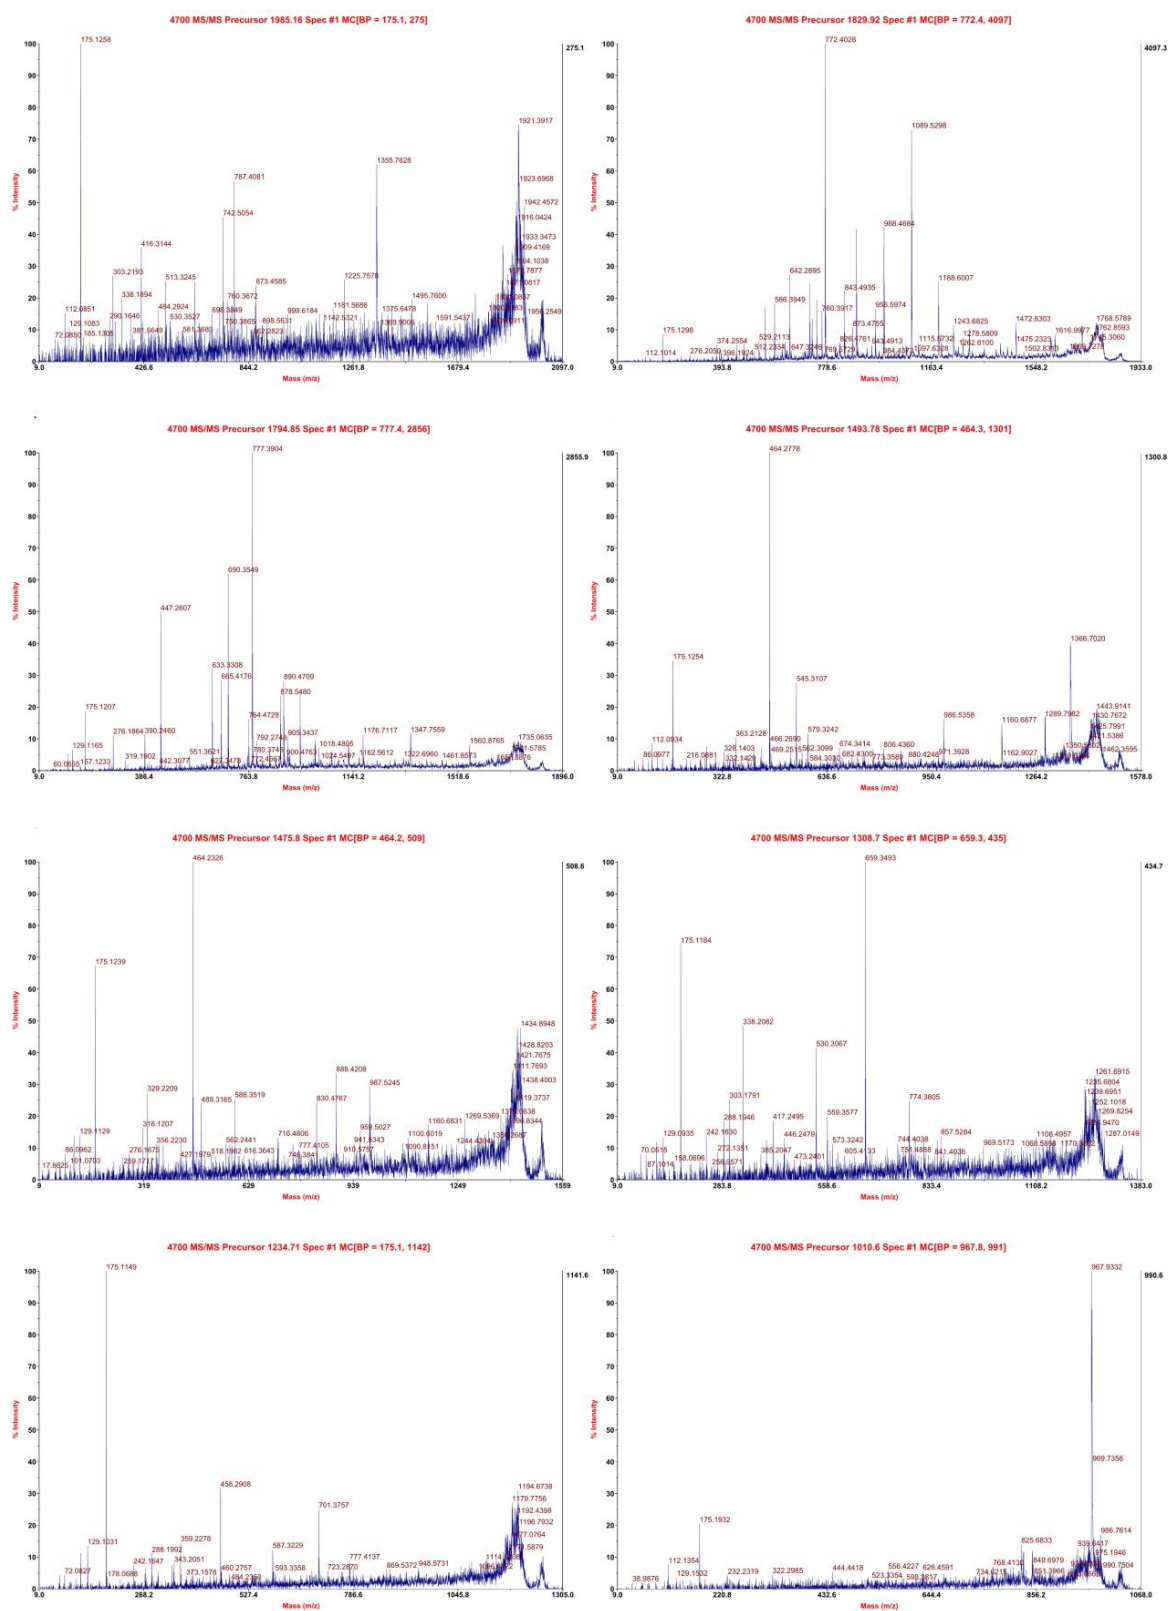

Figure S7 Secondary mass spectrum antifungal protein 2-1-1F

# **Mascot Search Results**

## **Protein View**

Match to: **tr|S6FXJ3|S6FXJ3\_9BACI** Score: **394** Expect: **1e-035**  
**Flagellar hook protein OS=Bacillus velezensis UCB5033 OX=1338518 GN=flgE PE=3 SV=1**

Nominal mass ( $M_r$ ): **27083**; Calculated pI value: **4.97**

NCBI BLAST search of **tr|S6FXJ3|S6FXJ3\_9BACI** against nr

Unformatted [sequence string](#) for pasting into other applications

Variable modifications: Carbamidomethyl (C), Oxidation (M)

Cleavage by Trypsin: cuts C-term side of KR unless next residue is P

Sequence Coverage: **76%**

Matched peptides shown in **Bold Red**

**1 MLRSLSYSGIS G**MKNFQTKLD VIGNNIANVN TVGFKKSRVT FKDMISQTVA  
**51 GGS**NVTNSKQ IGLGAATSSI DVVHSTGAPQ ATQNKIDLAI DGDGYFQINT  
**101 GAGIV**YTRAG NFGKDNQGNL VTIDGYYLEK IGGGKINIPT DAKDYSIGAD  
**151 GTVI**YTDAGD EVHDAGQIGL VTFPNSAGLE KIGGNLYRES LSSGAASAVT  
**201 TPG**ENGTKGL LAGYLEMSNV DLTDEFTEMI VAQRGFSQNS KIITTSDEIL  
**251 QELV**NLKR

Figure S8 Mass spectrum identification for antifungal protein 2-1-1F

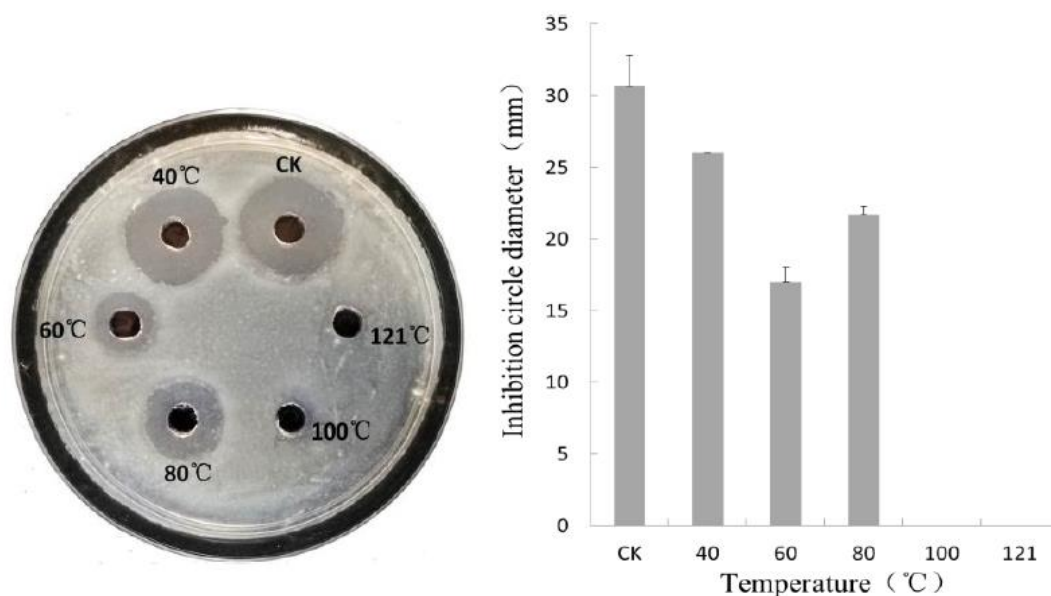

Figure S9 Thermal stability of antifungal crude protein 2F



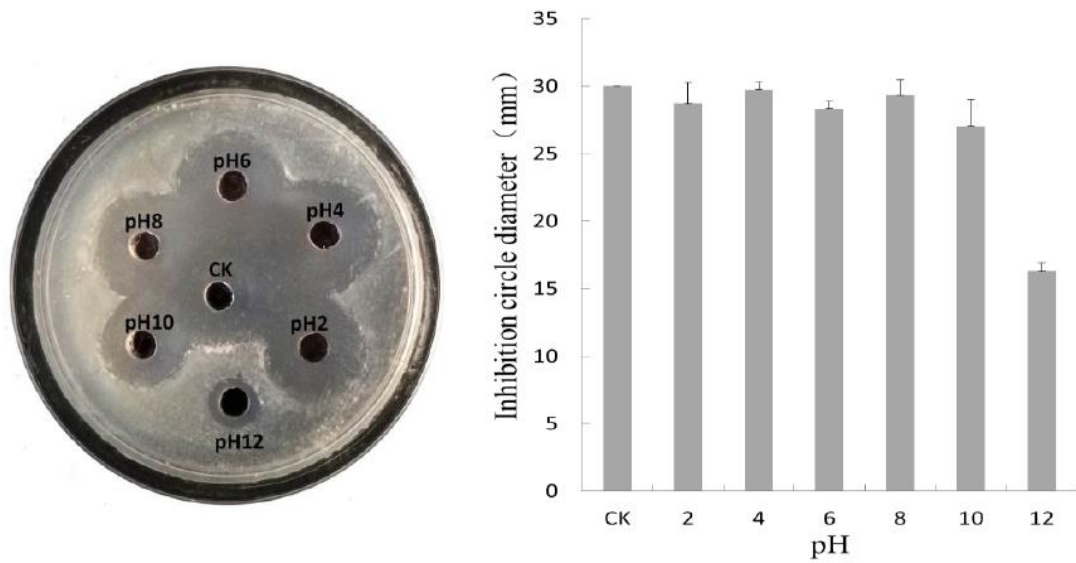

**Figure S10** Acid-base stability of antifungal crude protein 2F

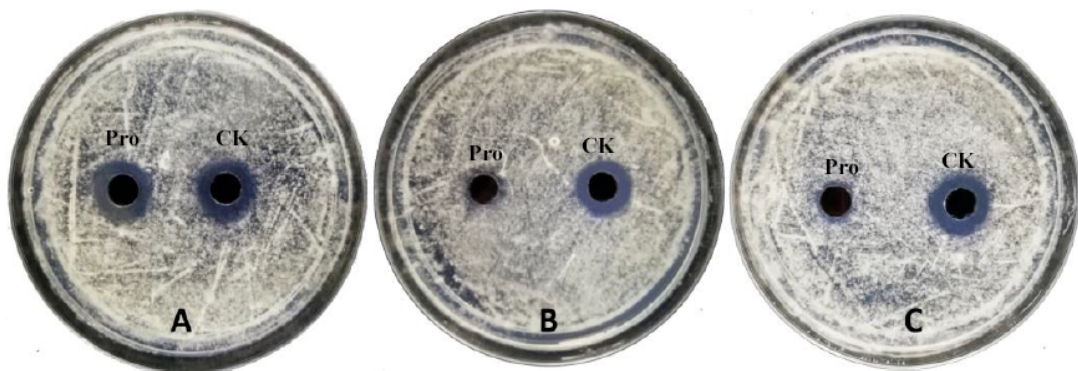

**Figure S11** Antifungal crude protein 2F under UV, chloroform, and proteinase K stability (Note: A, B, C for UV, chloroform, proteinase K treatment, respectively)

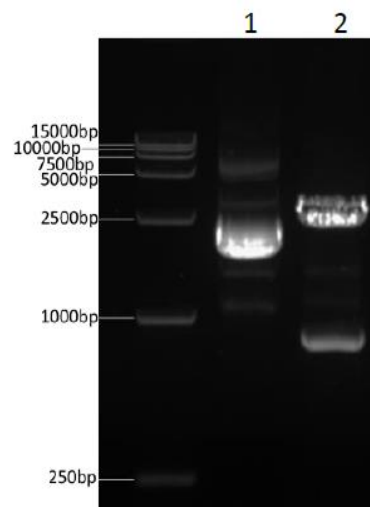

**Figure S12** Double enzyme digestion detection of TA cloning vector (Note: 1 for no digestion, 2 for double digestion)

Upperline:from1to777 (Clone sequence)  
 Lowerline:from1to777 (Original sequence)  
 identity=98.71%(767/777) gap=0.00%(0/777)

```

1  ATGTTACGTTTCATTATATTCCGGTATCAGCGGCATGAAAACTTTCAGACAAAAGTAGAT
1  ATGTTACGTTTCATTATATTCCGGTATCAGCGGCATGAAAACTTTCAGACAAAAGTAGAT
61  GTAATCGGCAATAACATCGCCAACGTCAACACAGTGGGATTTAAGAAAAGCCGCGTTACA
61  GTAATCGGCAATAACATCGCCAACGTCAACACAGTGGGATTTAAGAAAAGCCGCGTTACA
121  TTTAAAGATATGATCAGCCAGACAGTCGCCGGCGGTTCAAACGTGACCAATTCAAAACAA
121  TTTAAAGATATGATCAGCCAGACAGTCGCCGGCGGTTCAAACGTGACCAATTCAAAACAA
181  ATCGGCTTAGGTGCCGCGACTTCTTCCATTGATGTGTTCATTCAACCGGCGCCCCGCAG
181  ATCGGCTTGGTGCCGCGACTTCTTCCATTGATGTCGTTCATTCAACCGGCGCCCCGCAG
241  GCTACACAGAATAAAACCGACCTAGCCATTGACGGAGACGGCTACTTTCAGATTAATACA
241  GCTACACAGAATAAAACCGACCTAGCCATTGACGGAGACGGATACTTTCAGATTAATACA
301  GGCGCGGGAATTGTTTACACACGTGCGGGAATTTCGGAAAGGACAATCAAGGCAACCTT
301  GGTTCGGGAATCGTTTACACACGTGCGGGAATTTCGGAAAGGACAATCAAGGCAACCTT
361  GTTACGACTGACGGGTACTATCTTGAAAAAATCGGCGCGGCAAAATCAATATTCCGACT
361  GTTACGACTGACGGGTACTACCTTGAAAAAATCGGCGCGGCAAAATCAATATTCCGACT
421  GATGCGAAAGATTACAGCATCGGTGCAGACGGAACCGTTACATACACTGATGCAGGGGAT
421  GATGCGAAAGATTACAGCATCGGTGCAGACGGAACCGTTACATACACTGATGCAGGGGAT
481  GAGGTTCATGATGCCGGACAAATCGGTCTGGTCACGTTCCCTAACAGCGCCGGTCTGGAA
481  GCGGTTCATGATGCCGGACAAATCGGTCTGGTCACGTTCCCTAACAGCGCCGGTCTGGAA
541  AAAATCGGAGGCAACCTTTACAGAGAATCATTAAGTTTCAGGAGCTGCGAGCGCAGTCACC
541  AAAATCGGAGGCAACCTTTATAGAGAATCATTAAGTTTCAGGAGCTGCGAGCGCAGTCACC
601  ACTCCGGGCGAAAACGGAAACGGGTAAAGCTTTTGGCAGGCTATCTTGAAATGTCAAACGTA
601  ACTCCGGGCGAAAACGGAAACGGGTAAAGCTTTTGGCAGGCTATCTTGAAATGTCAAACGTA
661  GATCTGACAGATGAATTTACCGAAATGATCGTTGCTCAGCGCGGTTTCCAATCAAACCTCA
661  GATCTGACAGATGAATTTACCGAAATGATCGTTGCTCAGCGCGGTTTCCAATCAAACCTCA
721  AAAATCATTACGACTTCAGATGAAATCCTTCAGGAGCTGGTTAATCTGAAACGGTAA
721  AAAATCATTACGACTTCAGATGAAATCCTTCAGGAGCTGGTTAATCTGAAACGGTAA

```

Figure S13 Result of plasmid sequence of target gene



CLUSTAL O(1.2.4) multiple sequence alignment

|                |                                                              | Flagellin family |     |
|----------------|--------------------------------------------------------------|------------------|-----|
| WP_02253864.1  | -----MRINHNI AALNTSRQLNAGSNSAAKNMEKLS SGLRINRAGD             |                  | 41  |
| ABN13608.1     | -----MRINHNI AALNTSRQLNAGSNSAAKNMEKLS SGLRINRAGD             |                  | 41  |
| BAB58972.1     | -----MRINHNI AALNTSRQLNAGSNSAAKNMEKLS SGLRINRAGD             |                  | 41  |
| WP_015714795.1 | -----MRINHNI AALNTLNRLSSNNGASQKNMEKLS SGLRINRAGD             |                  | 41  |
| WP_014665528.1 | -----MRINHNI AALNTLNRLSSNNGASQKNMEKLS SGLRINRAGD             |                  | 41  |
| WP_007408329.1 | -----MGMKK-----KLSLG-----VASA                                |                  | 14  |
|                |                                                              | FlgG family      |     |
| WP_053602811.1 | MLRSLYSGVSGMKNFQTKLDVIGNNIANVGTGFKKSRVT----FQDTFSQQ----LAGA  |                  | 52  |
| KIU12641.1     | MLRSLYSGISGMKNFQTKLDVIGNNIANVNTVGFKKSRVT----FKDMVSQT----IAGG |                  | 52  |
| CDG29557.1     | MLRSLYSGISGMKNFQTKLDVIGNNIANVNTVGFKKSRVT----FKDMISQT----VAGG |                  | 52  |
| WP_061520525.1 | MLRSLYSGISGMKNFQTKLDVIGNNIANVNTVGFKKSRVT----FKDMISQT----VAGG |                  | 52  |
| RFU68865.1     | MLRSMYSGISGMKNFQTKLDVIGNNIANVNTVGFKKGRVV----FKDLINQD----LTGA |                  | 52  |
| WP_053584334.1 | MLRSMYSGISGLKNFQTKLDVIGNNIANVNTHGFKKGRVI----FKDLSQT----QAGA  |                  | 52  |
|                |                                                              | Flagellin family |     |
| WP_02253864.1  | AANDTNTD-SDRSELQKEMDQLSSEV-----TRIS-----T                    |                  | 126 |
| ABN13608.1     | AANDTNTD-SDRSELQKEMDQLASEV-----TRIS-----T                    |                  | 126 |
| BAB58972.1     | AANDTNTD-SDRSELQKEMDQLASEV-----TRIS-----T                    |                  | 126 |
| WP_015714795.1 | ANNTGTQDGTDLGAIQEEIKSLLEEVGGMGTGSGKGIS-----D                 |                  | 134 |
| WP_014665528.1 | AGNTGTQQTEDLTAIKDEMDALTEI-----DGIS-----Q                     |                  | 127 |
| WP_007408329.1 | EQS-ANVNL SN---LKP GD-----KLT KDFEFNRNGSLAIKEVLMALN          |                  | 88  |
|                |                                                              | FlgG family      |     |
| WP_053602811.1 | GE--GYLTVSD-----EEGETFYSRAGNLYLDQDSRLVTADGLYV--              |                  | 135 |
| KIU12641.1     | GD--GYFRIDT-----GDG-TAYTREGNFYLDNTGTLVTGDGYHV--              |                  | 134 |
| CDG29557.1     | GD--GYFQINT-----GAG-I VYTRAGNFYLDNTGTLVTGDGYV--              |                  | 128 |
| WP_061520525.1 | GD--GYFQINT-----GSG-IAYTRAGNFYLDNTGTLVTGDGYV--               |                  | 128 |
| RFU68865.1     | GD--GYFVVG D-----TAGNESYTRAGNFYLDSTGDLVTGDGLYV--             |                  | 136 |
| WP_053584334.1 | GE--GFFMVAK---YNPNG--DSETIAGESFDNVAYTRAGNFYMDQEGFLVDASGNVY-- |                  | 148 |
|                |                                                              | Flagellin family |     |
| WP_02253864.1  | D-GTLKSGD---GNSTATWADEEV-TDGKVTKEAGYYDDKGALVGSEKLEEGEKL SKGI |                  | 231 |
| ABN13608.1     | DQNTLTATD---GS-TATWADA---DDATNKPAGYYDAGGKVIASEKLAADSKVT KGI  |                  | 228 |
| BAB58972.1     | DQNTLTSTD---GKSTATWADEVTDPGKVTKAAGYYDTDGKVIASEKLAADSKVT KGI  |                  | 233 |
| WP_015714795.1 | -----TAFKDD-----                                             |                  | 190 |
| WP_014665528.1 | -----SA--E-----                                              |                  | 179 |
| WP_007408329.1 | KQDKAAAEA---ISKHIDPK--FLSESGKVNVA-----                       |                  | 171 |
|                |                                                              | FlgG family      |     |
| WP_053602811.1 | -----PIPQDATSLTIDEFGTVSYLNN---EN-----QVENAG                  |                  | 170 |
| KIU12641.1     | -----TIKIPTDAQSF SIGSDGKVSIVVA---EG-----KTQDGG               |                  | 172 |
| CDG29557.1     | -----KINIPTDAKDYSIGADGTVTYTDA---GD-----EVHDAG                |                  | 166 |
| WP_061520525.1 | -----KINIPTDAKDYSIGPDGNVITYTDS---GD-----QVHNAG               |                  | 166 |
| RFU68865.1     | ----TAGAAFP AIIINIPTTATDMSISKNGTITFMDG---GI-----LRTAG        |                  | 184 |
| WP_053584334.1 | EWEELQTEVVGTRIRIPTDAKSMSIGADGKVTF TDS---EG-----LKFAG         |                  | 222 |
|                |                                                              | Flagellin family |     |
| WP_02253864.1  | VDMASEM-----MEYTKNNILTQASQAMLAQANQQPQVQLQLLKG-----           |                  | 331 |
| ABN13608.1     | VDMASEM-----MEYTKNNILTQASQAMLAQANQ-----                      |                  | 317 |
| BAB58972.1     | VDMASEM-----MEYTKNNILTQASQAMLAQANQQPQVQLQLLKG-----           |                  | 333 |
| WP_015714795.1 | VDMAKEM-----SEFTKNNILSQASQAMLAQANQQPQVQLQLLR-----            |                  | 284 |
| WP_014665528.1 | VDMAKEM-----SDFTKNNILSQASQAMLAQANQQPQVQLQLLR-----            |                  | 273 |
| WP_007408329.1 | KNDTAKTADGLSVQNKFGQNAISLQFSFEATQW-----NGLTITKDHTDKDGYV KENEK |                  | 254 |
|                |                                                              | FlgG family      |     |
| WP_053602811.1 | VELSDEFTTEMIVGQRFQANSKIITTSDEILQ-----ELLNLKR-----            |                  | 261 |
| KIU12641.1     | VDLTDEFTTEMIVAQRFQNSKIITTSDEILQ-----ELVNLKR-----             |                  | 264 |
| CDG29557.1     | VDLTDEFTTEMIVAQRFQNSKIITTSDEILQ-----ELVNLKR-----             |                  | 258 |
| WP_061520525.1 | VDLTDEFTTEMIVAQRFQNSKIITTSDEILQ-----ELVNLKR-----             |                  | 258 |
| RFU68865.1     | VDLSEFTTEMIVAQRAFQSNTRIITTSDEILQ-----ELVNLKR-----            |                  | 275 |
| WP_053584334.1 | VDLSEFTTEMIVAQRFQANTRIITTSDEILQ-----ELVNLKR-----             |                  | 313 |

Figure S14 Sequence alignment of flagellin conserved regions
